# Supplementary material
Source: publisher figshare collection journal article supplement (https://tandf.figshare.com/articles/dataset/_/1572261)
Supplement: Supplementary file 1 [file 1]

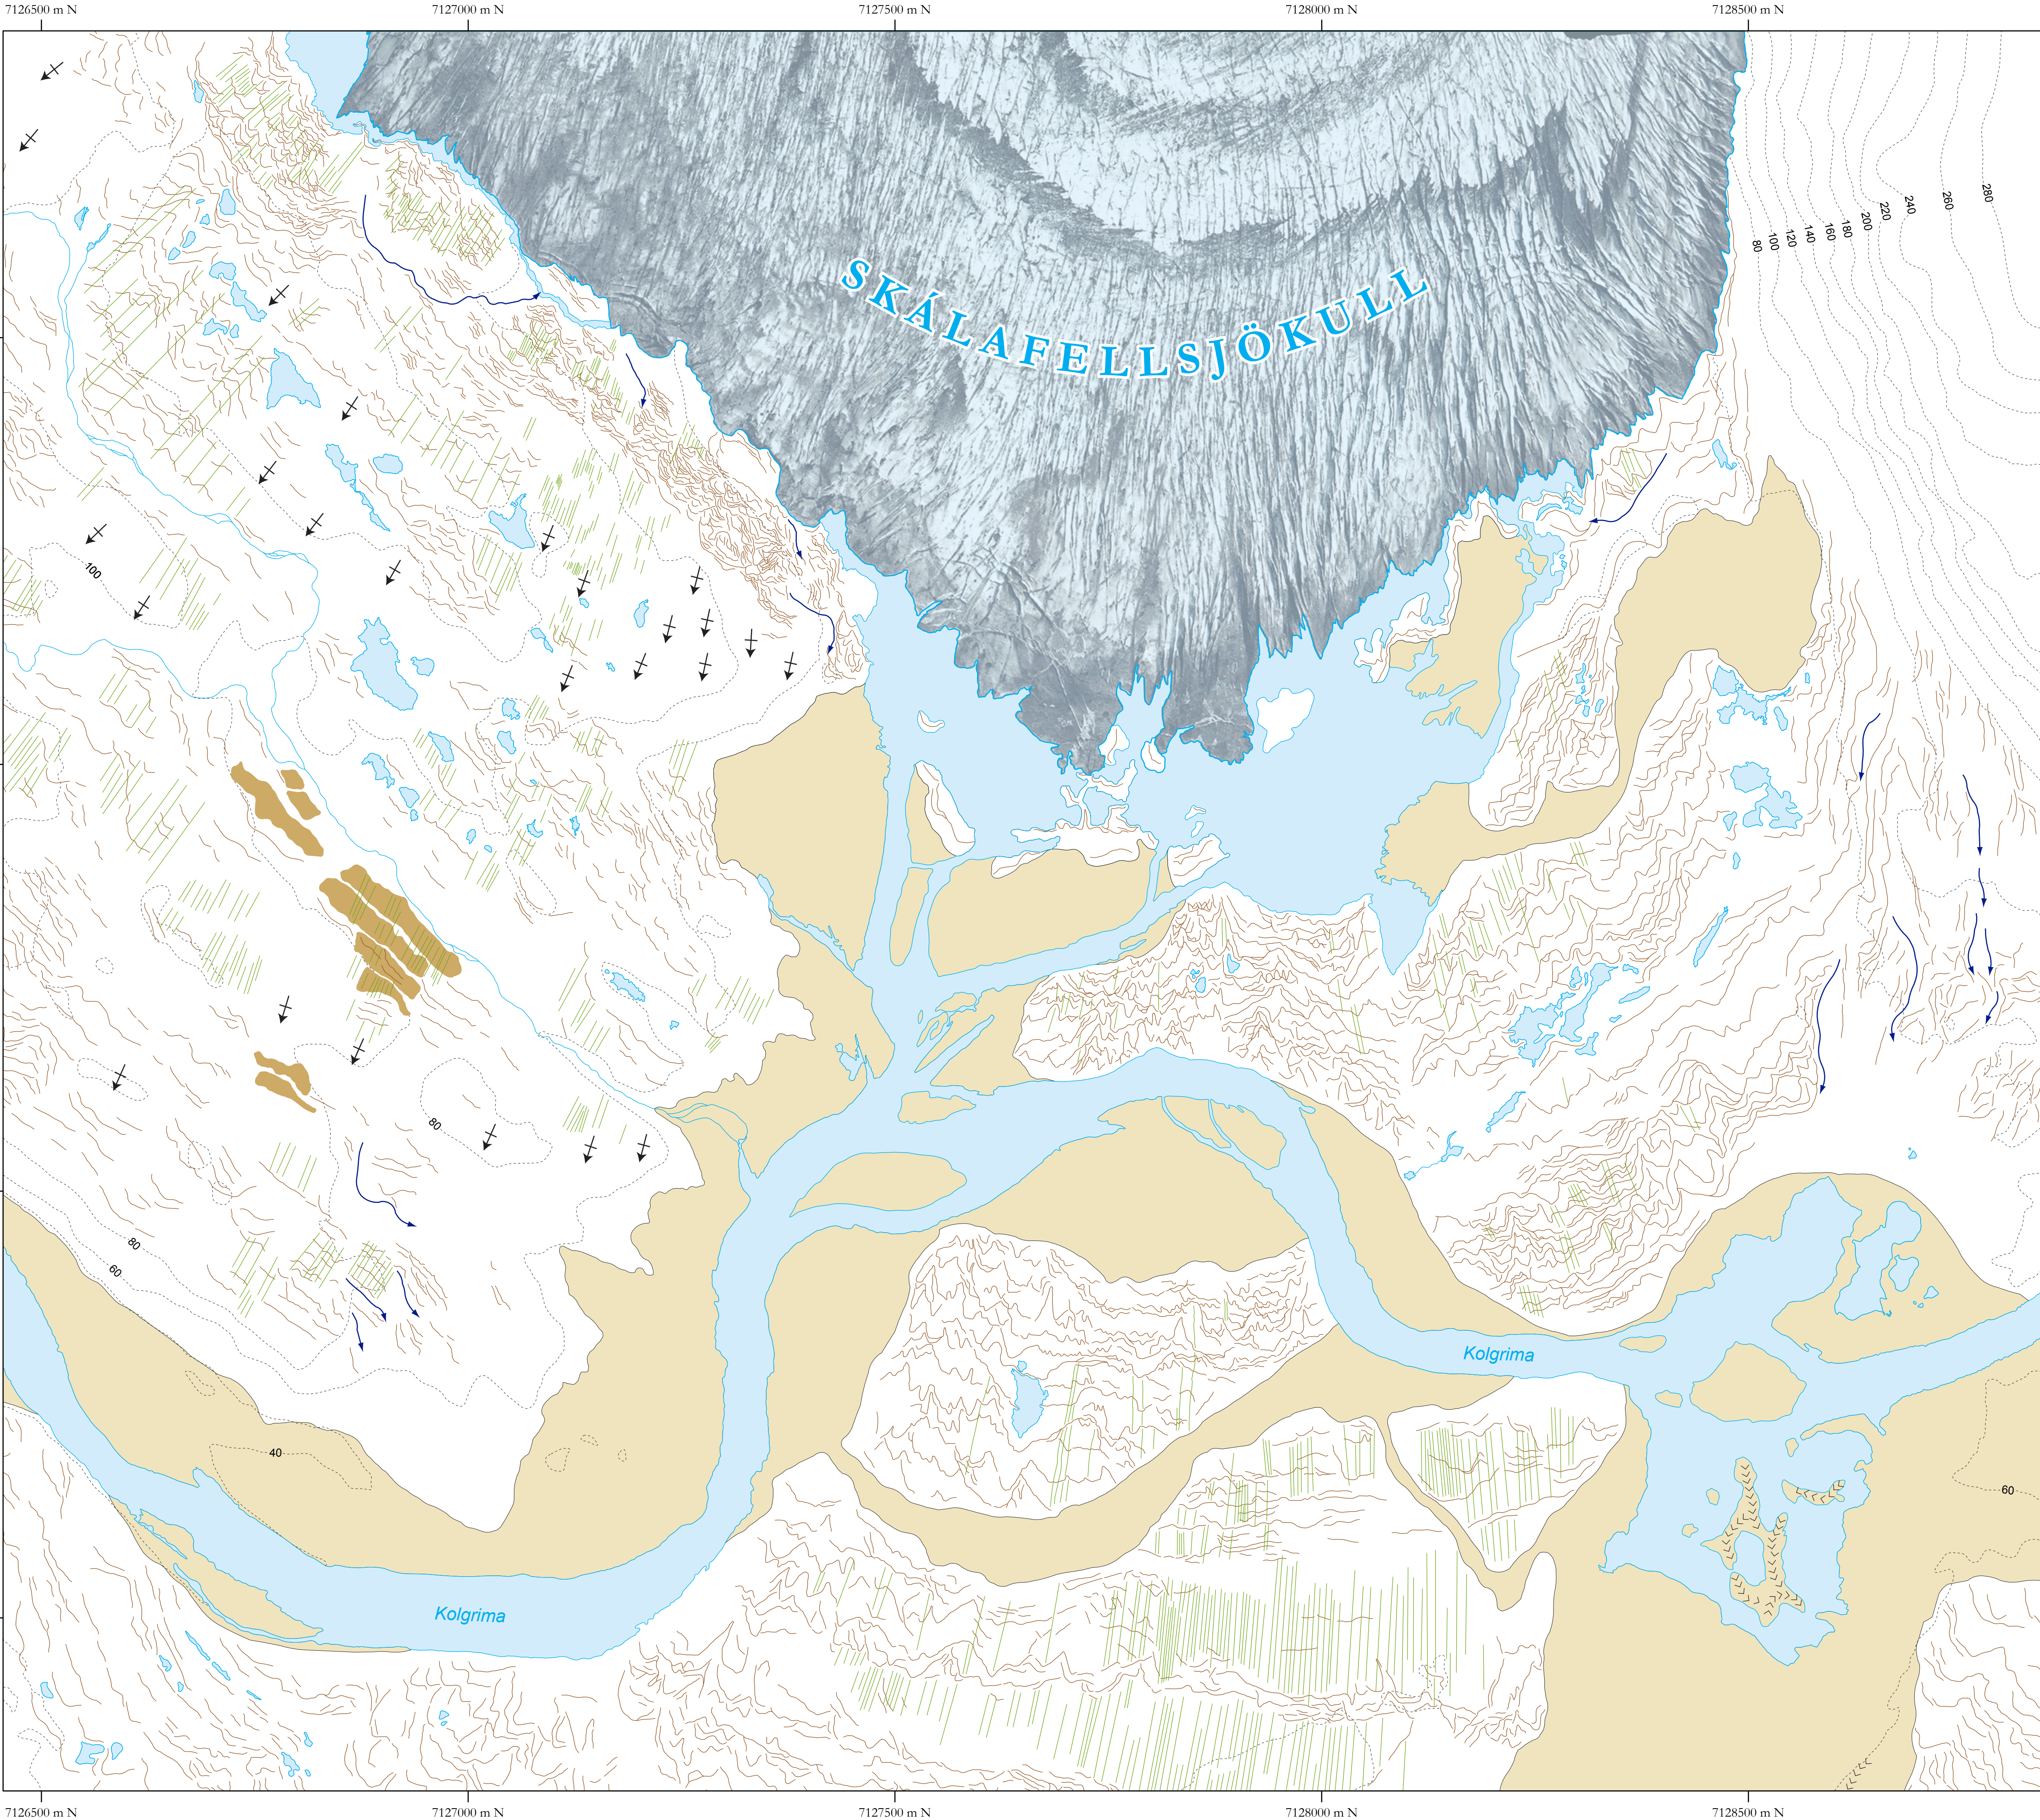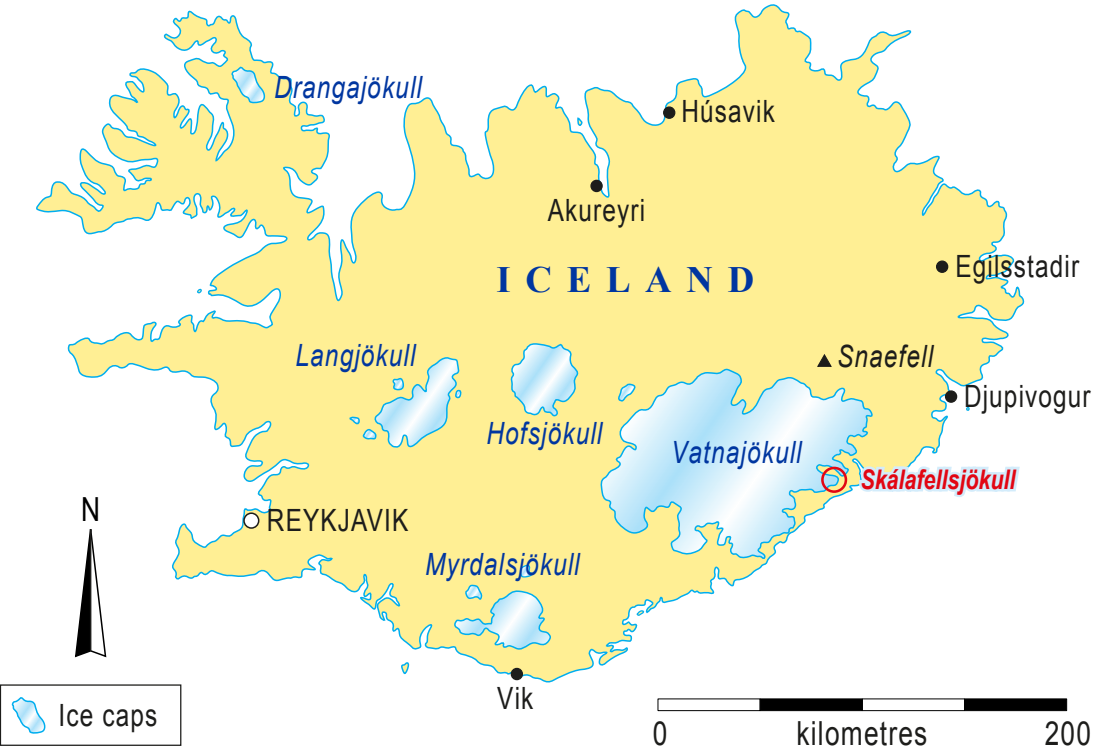

**GLACIAL GEOMORPHOLOGY  
OF THE SKÁLAFELLSJÖKULL  
FORELAND, ICELAND (2006):  
A CASE STUDY OF ‘ANNUAL’ MORAINES**

**Benjamin M.P. Chandler, David J.A. Evans,  
David H. Roberts, Marek Ewertowski  
and Alexander I. Clayton**

Department of Geography, Durham University, UK

- Moraine ridges
- Flutings
- Roches moutonnées
- Meltwater channels
- Eskers
- Kame terraces
- Water bodies
- Glaciofluvial sediments
- Glacier ice
- Contour lines at 20 m intervals

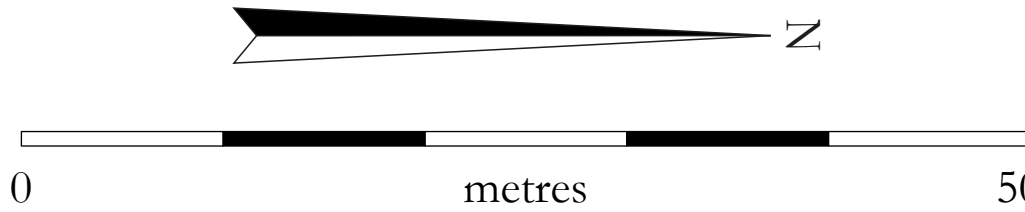

Projection: WGS 1984 / UTM Zone 28N (ESPG: 32628)

Contour lines based on ISN93 datum, spheroid GRS80.

Mapping by B.M.P. Chandler, based on aerial photography  
by *Löftmyndir ehf.*, 2006.

*Map to accompany paper:*  
Chandler, B.M.P. *et al.* (2015) Glacial geomorphology of the  
Skálafellsjökull foreland, Iceland: a case study of  
‘annual’ moraines. *Journal of Maps*.

© Journal of Maps, 2015.
